# Supplementary material
Source: PubMed Central journal article supplement (PMC4884646)
Supplement: NIHMS787890-supplement-S1.pdf [file NIHMS787890-supplement-S1.pdf]

**A**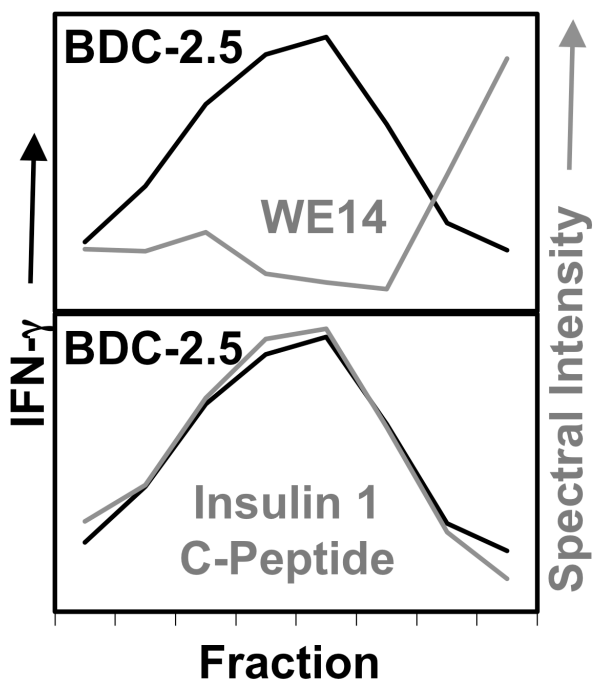**B**

| <b>Co-eluting Insulin 2 C-peptide Fragments</b> |  |
|-------------------------------------------------|--|
| EVEDPQVAQLELGGGPGAG                             |  |
| EVEDPQVAQLELGGGPGAGD                            |  |
| EVEDPQVAQLELGGGPGAGDL                           |  |
| EVEDPQVAQLELGGGPGAGDLQ                          |  |
| EVEDPQVAQLELGGGPGAGDLQT                         |  |
| EVEDPQVAQLELGGGPGAGDLQTL                        |  |
| EVEDPQVAQLELGGGPGAGDLQTLA                       |  |
| EVEDPQVAQLELGGGPGAGDLQTLAL                      |  |
| EVEDPQVAQLELGGGPGAGDLQTLALEVAQQ                 |  |
| WSRMDQLAKELTAE (WE14)                           |  |
