# Supplementary material
Source: PubMed Central journal article supplement (PMC4884646)
Supplement: NIHMS787890-supplement-S2.pdf [file NIHMS787890-supplement-S2.pdf]

**A**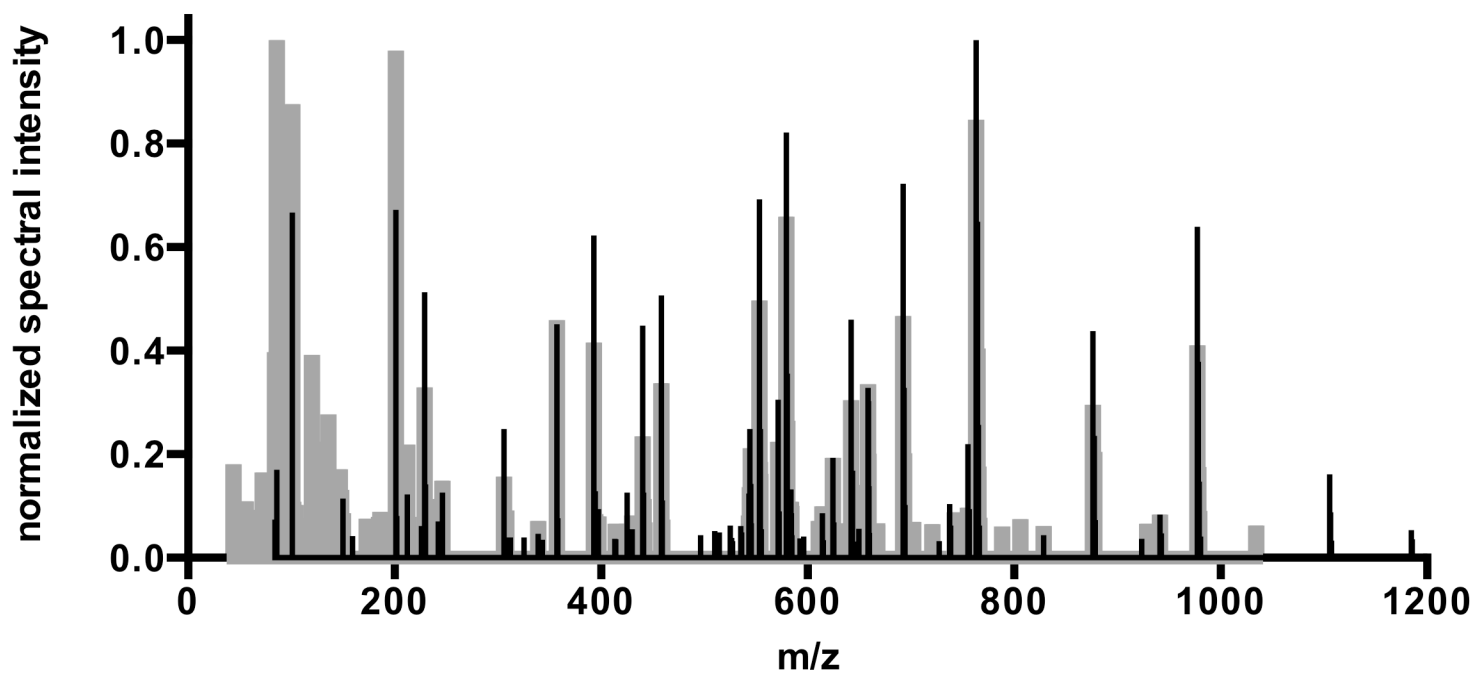**B**

|            | predicted | observed  | ppm  |            | predicted | observed  | ppm   |
|------------|-----------|-----------|------|------------|-----------|-----------|-------|
| <b>b1</b>  | 116.0342  | --        | --   | <b>y1</b>  | 150.0583  | 150.0566  | -11.3 |
| <b>b2</b>  | 229.1183  | 229.1179  | -1.7 | <b>y2</b>  | 306.1594  | 306.1585  | -2.9  |
| <b>b3</b>  | 357.1769  | 357.1738  | -8.7 | <b>y3</b>  | 393.1915  | 393.1903  | -3.1  |
| <b>b4</b>  | 458.2245  | 458.2237  | -1.7 | <b>y4</b>  | 579.2708  | 579.2703  | -0.9  |
| <b>b5</b>  | 571.3086  | 571.3054  | -5.6 | <b>y5</b>  | 692.3548  | 692.3498  | -7.2  |
| <b>b6</b>  | 642.3457  | 642.3439  | -2.8 | <b>y6</b>  | 763.3920  | 763.3900  | -2.6  |
| <b>b7</b>  | 755.4298  | 755.4233  | -8.6 | <b>y7</b>  | 876.4760  | 876.4731  | -3.3  |
| <b>b8</b>  | 941.5091  | 941.5051  | -4.2 | <b>y8</b>  | 977.5237  | 977.5204  | -3.4  |
| <b>b9</b>  | 1028.5411 | 1028.5395 | -1.6 | <b>y9</b>  | 1105.5823 | 1105.5725 | -8.9  |
| <b>b10</b> | 1184.6422 | 1184.6409 | -1.1 | <b>y10</b> | 1218.6663 | --        | --    |
