# Supplementary material
Source: PubMed Central journal article supplement (PMC4884646)
Supplement: NIHMS787890-supplement-S4.pdf [file NIHMS787890-supplement-S4.pdf]

**A**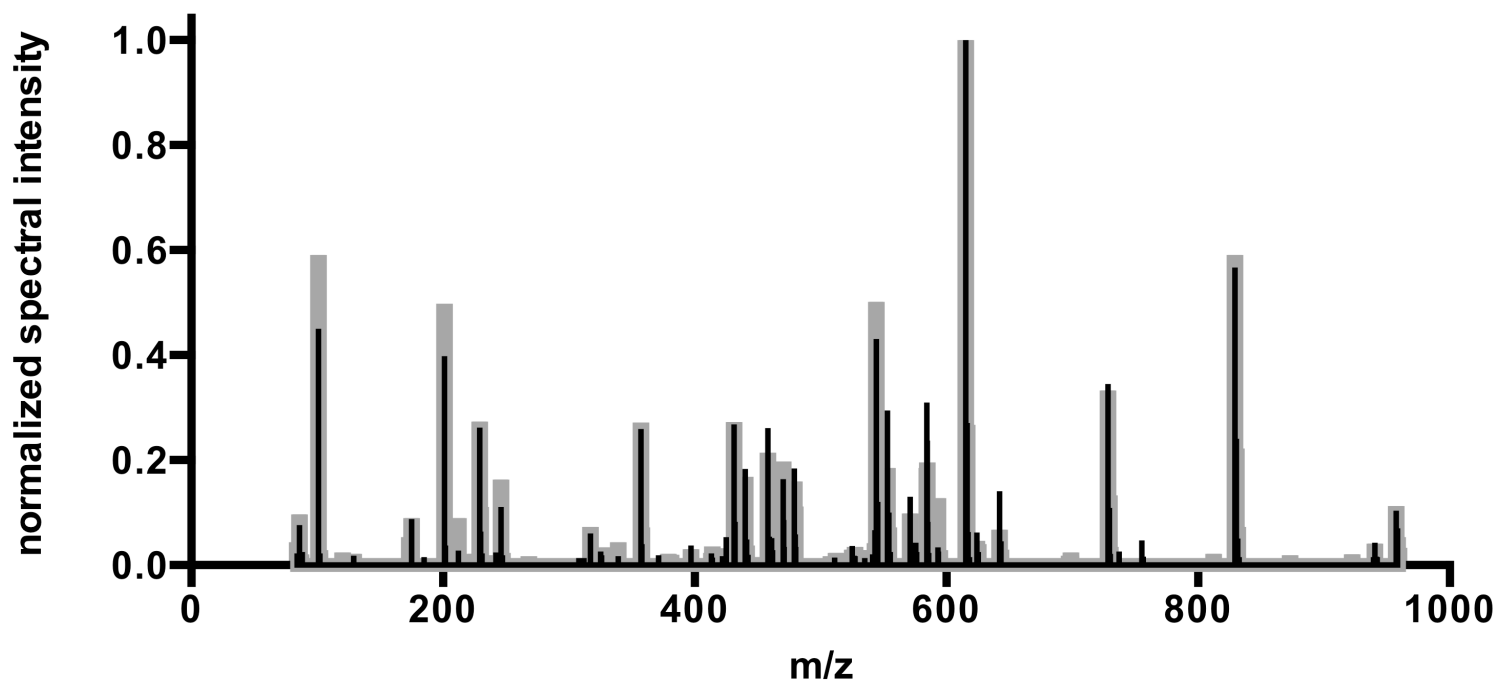**B**

|                       | predicted | observed | ppm   |                       | predicted | observed | ppm   |
|-----------------------|-----------|----------|-------|-----------------------|-----------|----------|-------|
| <b>b<sub>1</sub></b>  | 116.0342  | --       | --    | <b>y<sub>1</sub></b>  | 175.1190  | 175.1178 | -6.9  |
| <b>b<sub>2</sub></b>  | 229.1183  | 229.1177 | -2.6  | <b>y<sub>2</sub></b>  | 246.1561  | 246.1522 | -15.8 |
| <b>b<sub>3</sub></b>  | 357.1769  | 357.1751 | -5.0  | <b>y<sub>3</sub></b>  | 317.1932  | 317.1916 | -5.0  |
| <b>b<sub>4</sub></b>  | 458.2245  | 458.2229 | -3.5  | <b>y<sub>4</sub></b>  | 431.2361  | 431.2362 | +0.2  |
| <b>b<sub>5</sub></b>  | 571.3086  | 571.3087 | +0.2  | <b>y<sub>5</sub></b>  | 544.3202  | 544.3197 | -0.9  |
| <b>b<sub>6</sub></b>  | 642.3457  | 642.3449 | -1.2  | <b>y<sub>6</sub></b>  | 615.3573  | 615.3564 | -1.5  |
| <b>b<sub>7</sub></b>  | 755.4298  | 755.4203 | -12.6 | <b>y<sub>7</sub></b>  | 728.4413  | 728.4415 | +0.3  |
| <b>b<sub>8</sub></b>  | 869.4727  | 869.4622 | -12.1 | <b>y<sub>8</sub></b>  | 829.4890  | 829.4894 | +0.5  |
| <b>b<sub>9</sub></b>  | 940.5098  | 940.5182 | +8.9  | <b>y<sub>9</sub></b>  | 957.5476  | 957.5466 | -1.0  |
| <b>b<sub>10</sub></b> | 1011.5470 | --       | --    | <b>y<sub>10</sub></b> | 1070.6317 | --       | --    |
