# Supplementary material
Source: PubMed Central journal article supplement (PMC4884646)

### Fraction

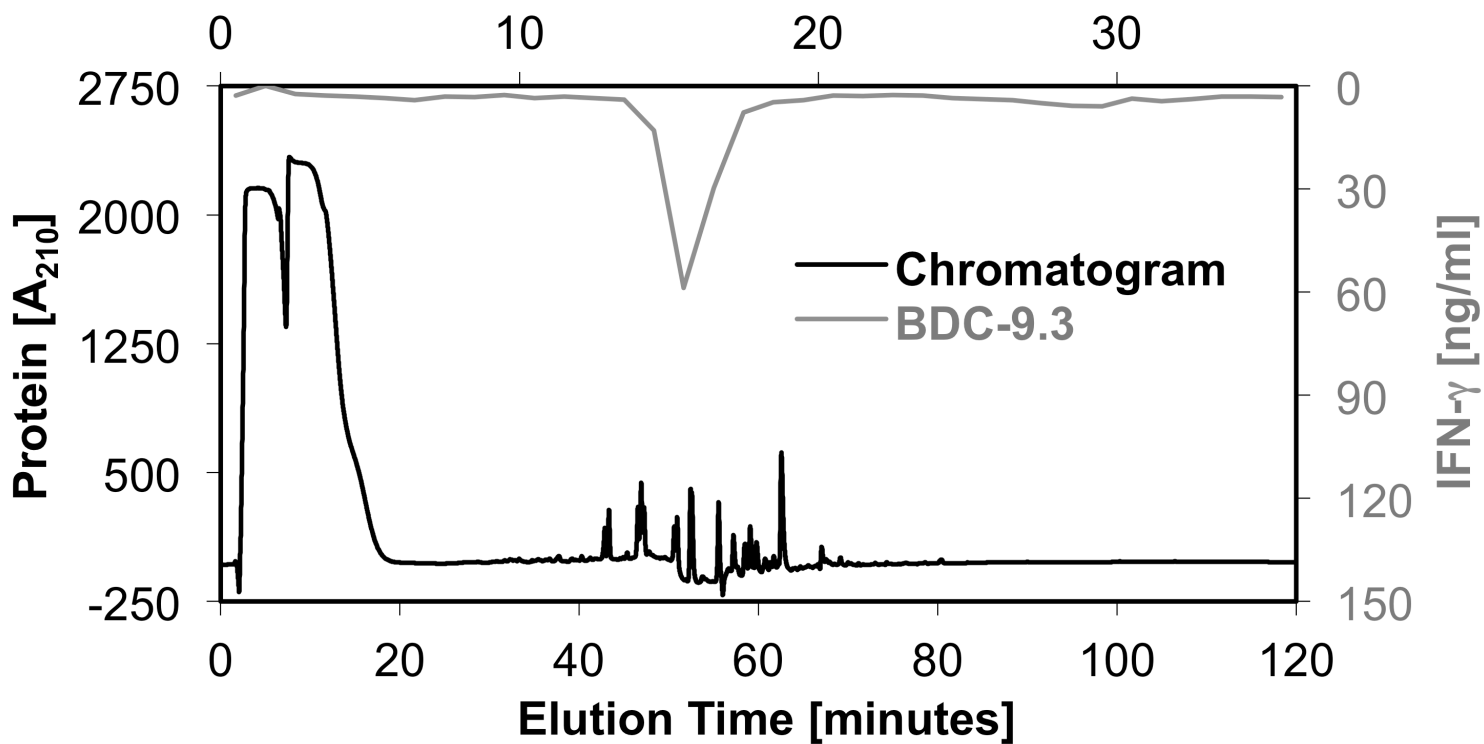

Supplement: NIHMS787890-supplement-S3.pdf [file NIHMS787890-supplement-S3.pdf]

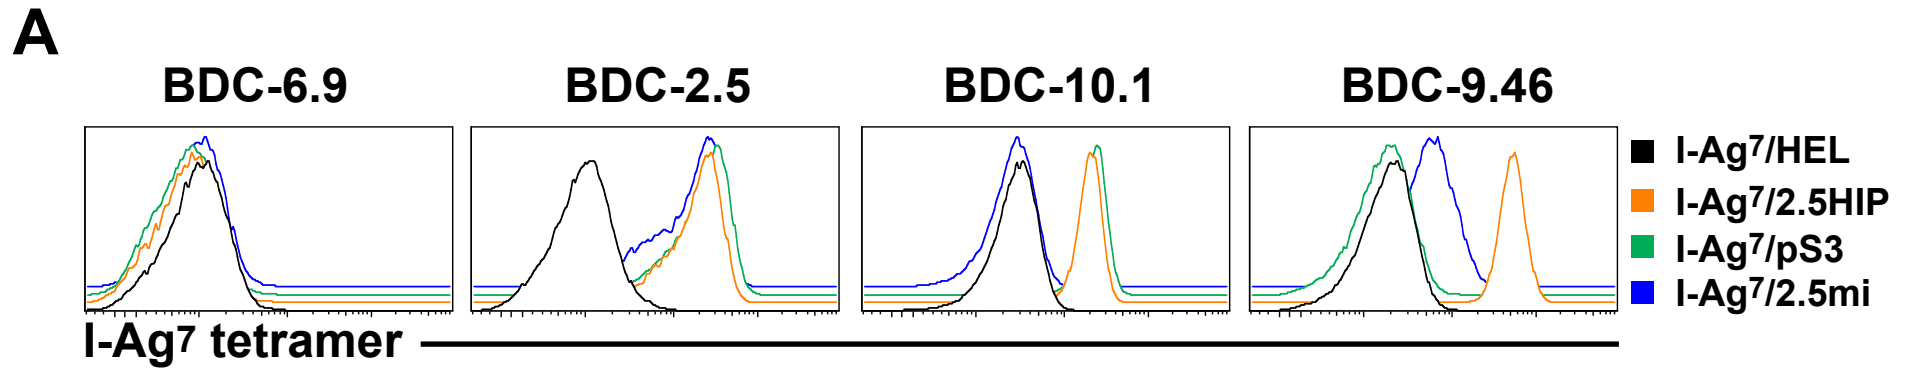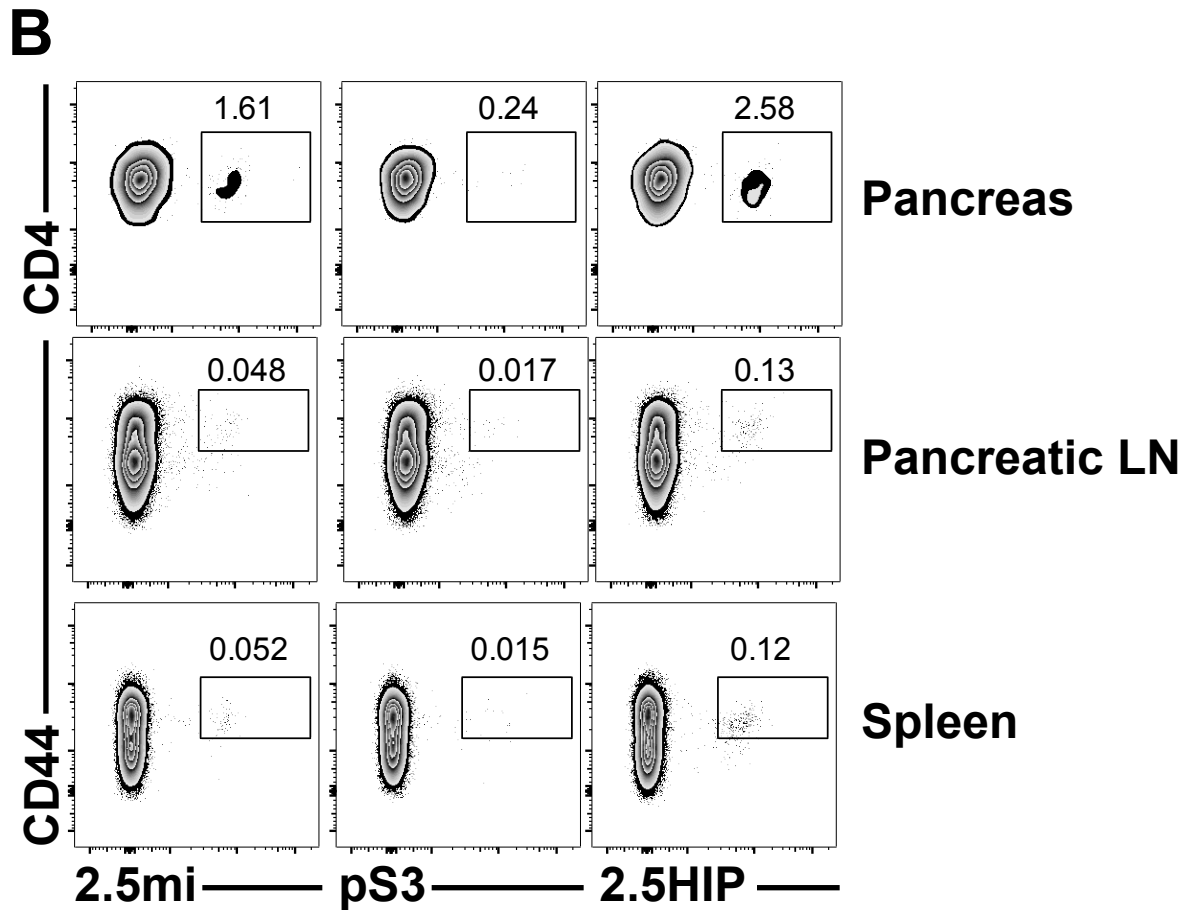

Supplement: NIHMS787890-supplement-S5.pdf [file NIHMS787890-supplement-S5.pdf]

**A**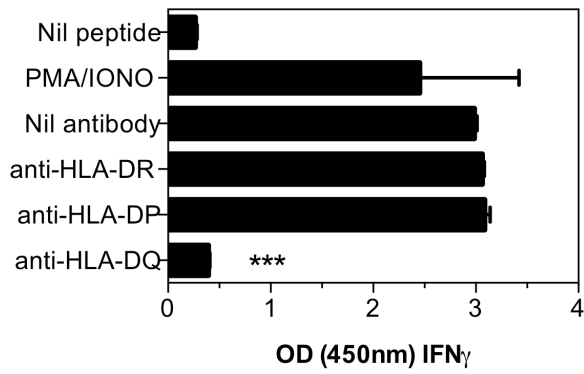**B**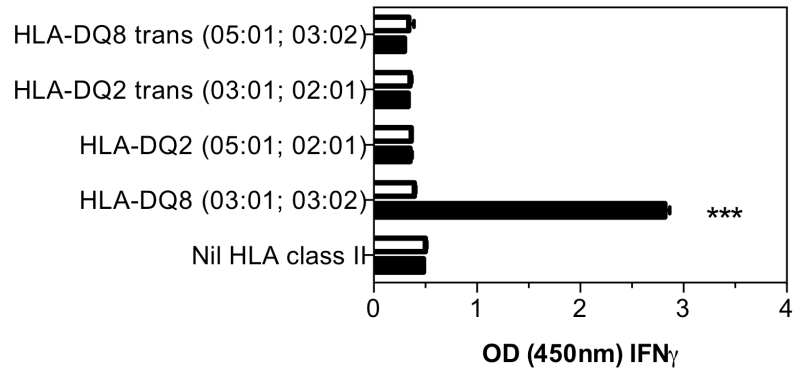**C**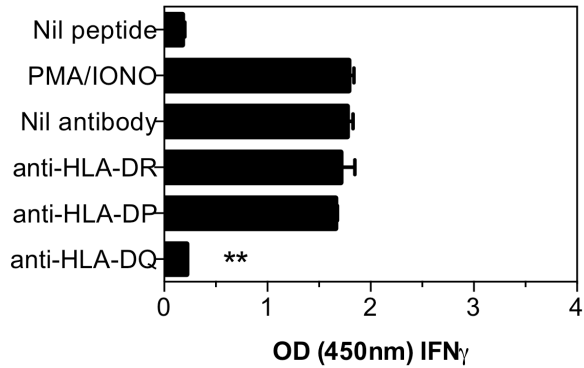**D**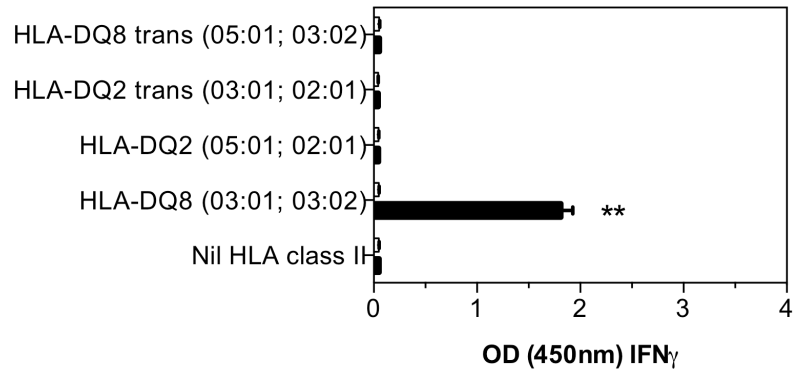

Supplement: NIHMS787890-supplement-S6.pdf [file NIHMS787890-supplement-S6.pdf]
